# Supplementary material
Source: MDPI journal article supplement (https://www.mdpi.com/1424-2818/15/1/69)
Supplement: s1 [file s1]

# Certificate of English Editing

---

## Title

The impacts of phosphorus-containing compounds on soil microorganisms of rice rhizosphere contaminated by lead

## Authors

Xingchen Pan, Wenjun Shi, Guiping Feng, Xiaolong Li, Qingwei Zhou, Li Fu, Meiqing Jin, Weihong Wu

## Date of Editing

December 18, 2022

This document certifies that the paper listed above has been edited to ensure that the language is clear and free of errors. The edit was performed by CHRISTOPHER JOHN SPACKMAN, native English speaker editor at STS (Changsha Shiyu Translation Service Co., Ltd.). The intent of the author's message was not altered in any way during the editing process. The quality of the edit has been guaranteed, with the assumption that our suggested changes have been accepted and have not been further altered without the knowledge of our editors.

Certificate issued by:

Changsha Shiyu Translation Service Co., Ltd.

Phone +86-731-88816880

Xianjiayu Road (W), Yuelu District, Changsha City, Hunan Prov, China.
